# Supplementary material for: NMR-Based Metabolomic Study on Phaseolus vulgaris Flour Fermented by Lactic Acid Bacteria and Yeasts
Source: MDPI journal article supplement (doi:10.3390/molecules28124864), 2023-06-20
Supplement: s1 [file s1]

# Supplementary materials

## NMR-based metabolomic study on *Phaseolus vulgaris* flour fermented by lactic acid bacteria and yeasts

Giuseppina Tatulli <sup>1</sup>, Laura Ruth Cagliani <sup>2,\*</sup>, Francesca Sparvoli <sup>3</sup>, Milena Brasca <sup>1</sup>, and Roberto Consonni <sup>2</sup>

<sup>1</sup> National Research Council, Institute of Sciences of Food Production (ISPA), via Celoria 2, 20133, Milan, Italy

<sup>2</sup> National Research Council, Institute of Chemical Sciences and Technologies "G. Natta" (SCITEC), via Corti 12, 20133, Milan, Italy

<sup>3</sup> National Research Council, Institute of Agricultural Biology and Biotechnology (IBBA), via Corti 12, 20133, Milan, Italy

\* Correspondence: lauraruth.cagliani@scitec.cnr.it; Tel. +390223699722

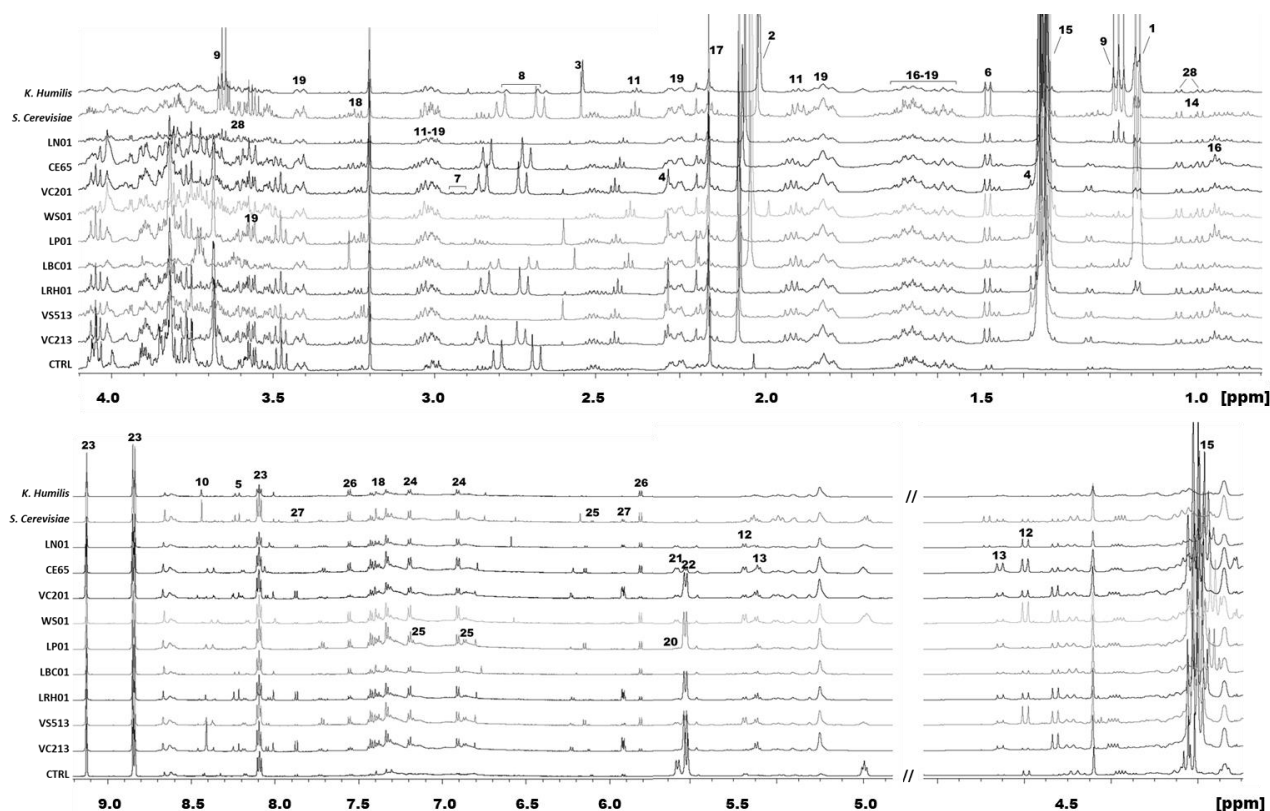

**Figure S1.** <sup>1</sup>H NMR spectra of aqueous extracts of all small-scale fermented bean flour samples, compared to control (CTRL). The numbers refer to metabolite peak assignments, as reported in Table 2.

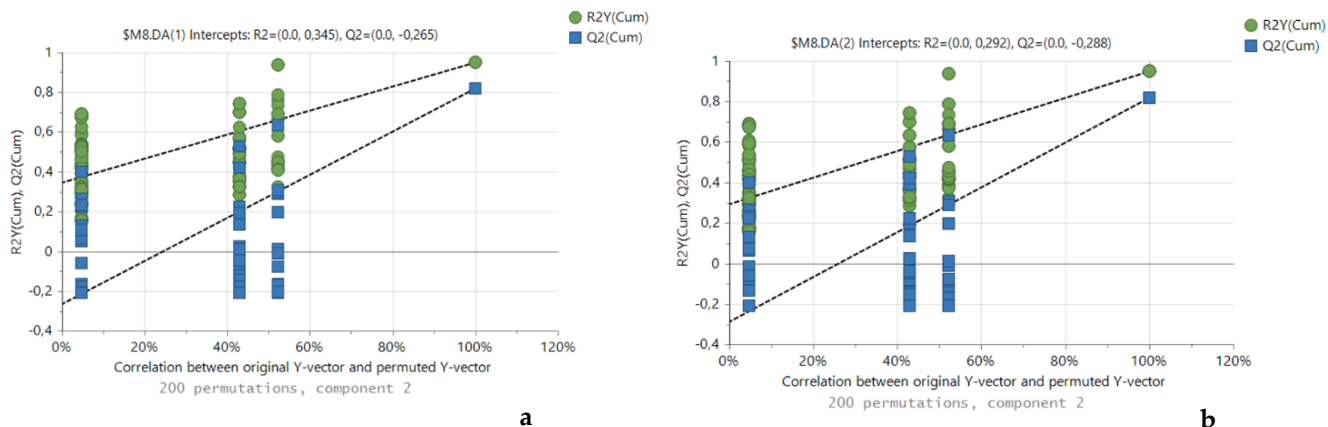

**Figure S2.** Permutation tests for OPLS-DA performed according to LAB metabolism, considering the complete  $^1\text{H}$  NMR spectra, and 200 rounds of random permutations for each class: **a)** hetero- and **b)** homofermentative LAB-fermented samples.

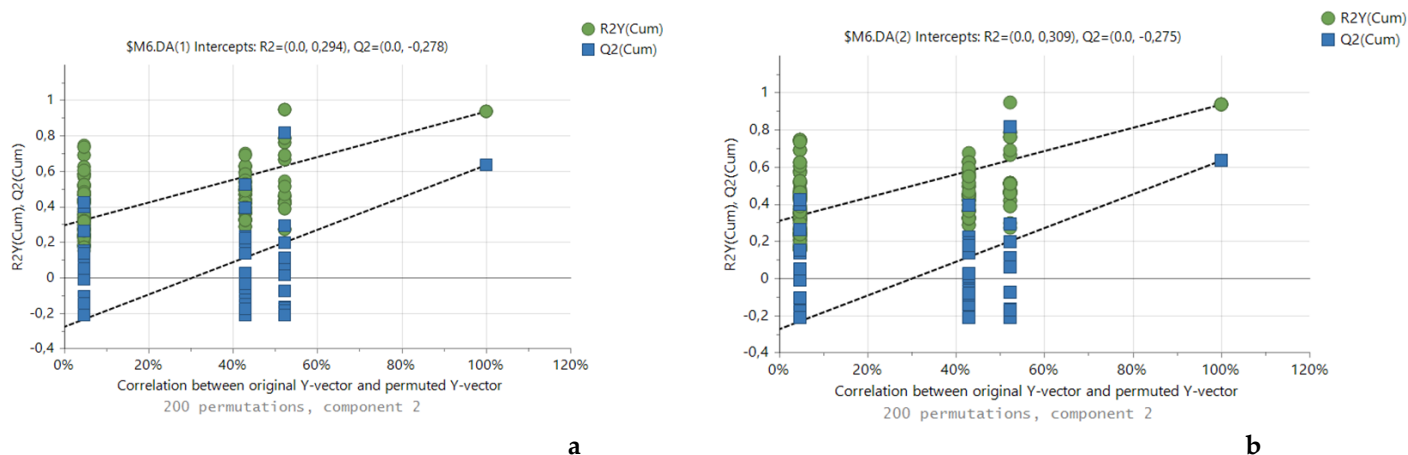

**Figure S3.** Permutation tests relative to PLS-DA performed according to LAB genera in the early taxonomy, considering the complete  $^1\text{H}$  NMR spectra, and 200 rounds of random permutations for each class: **a)** *Leuconostoc* and *Pediococcus* genera, and **b)** *Lactobacillus* genus.

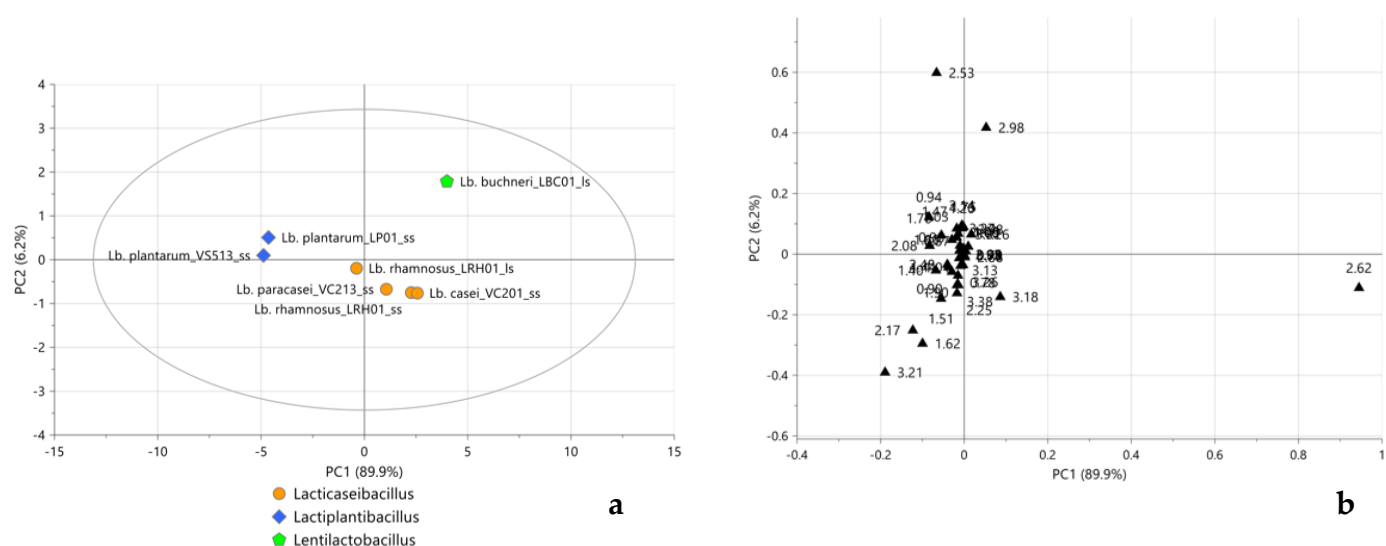

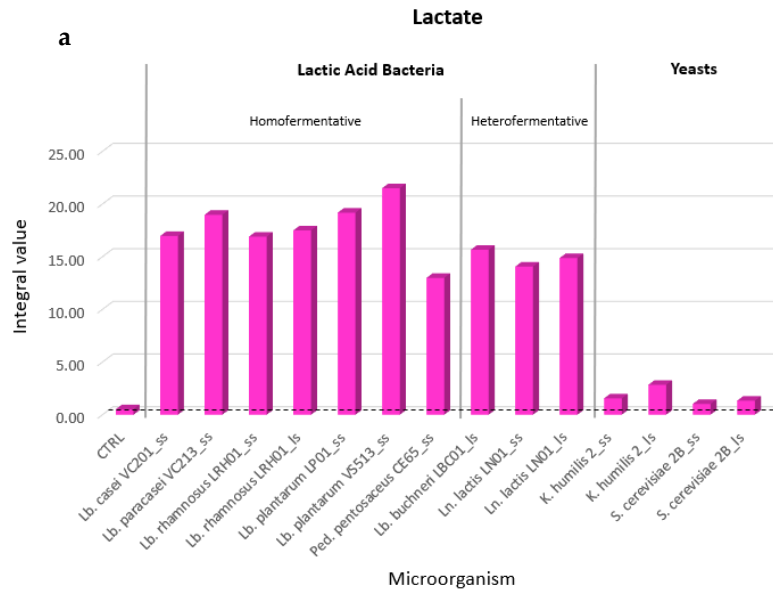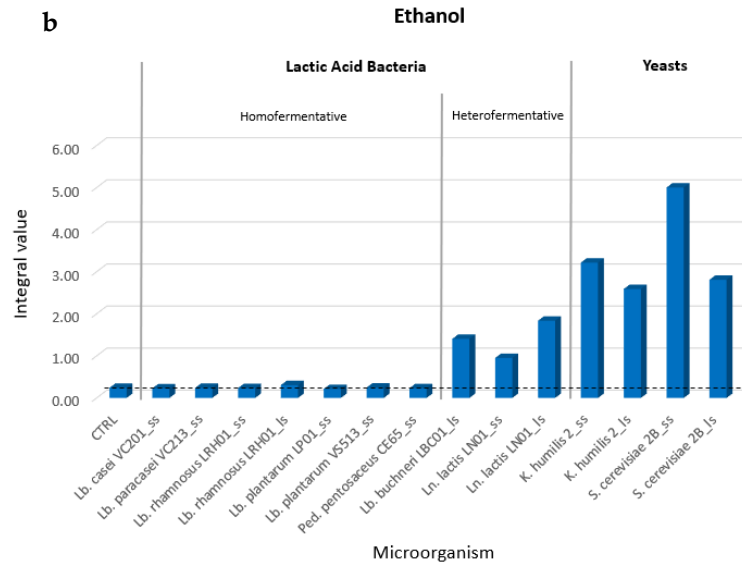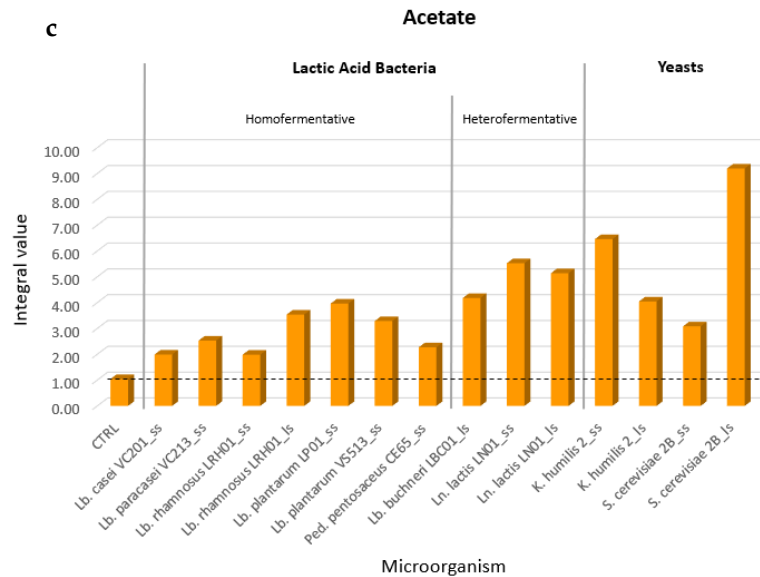

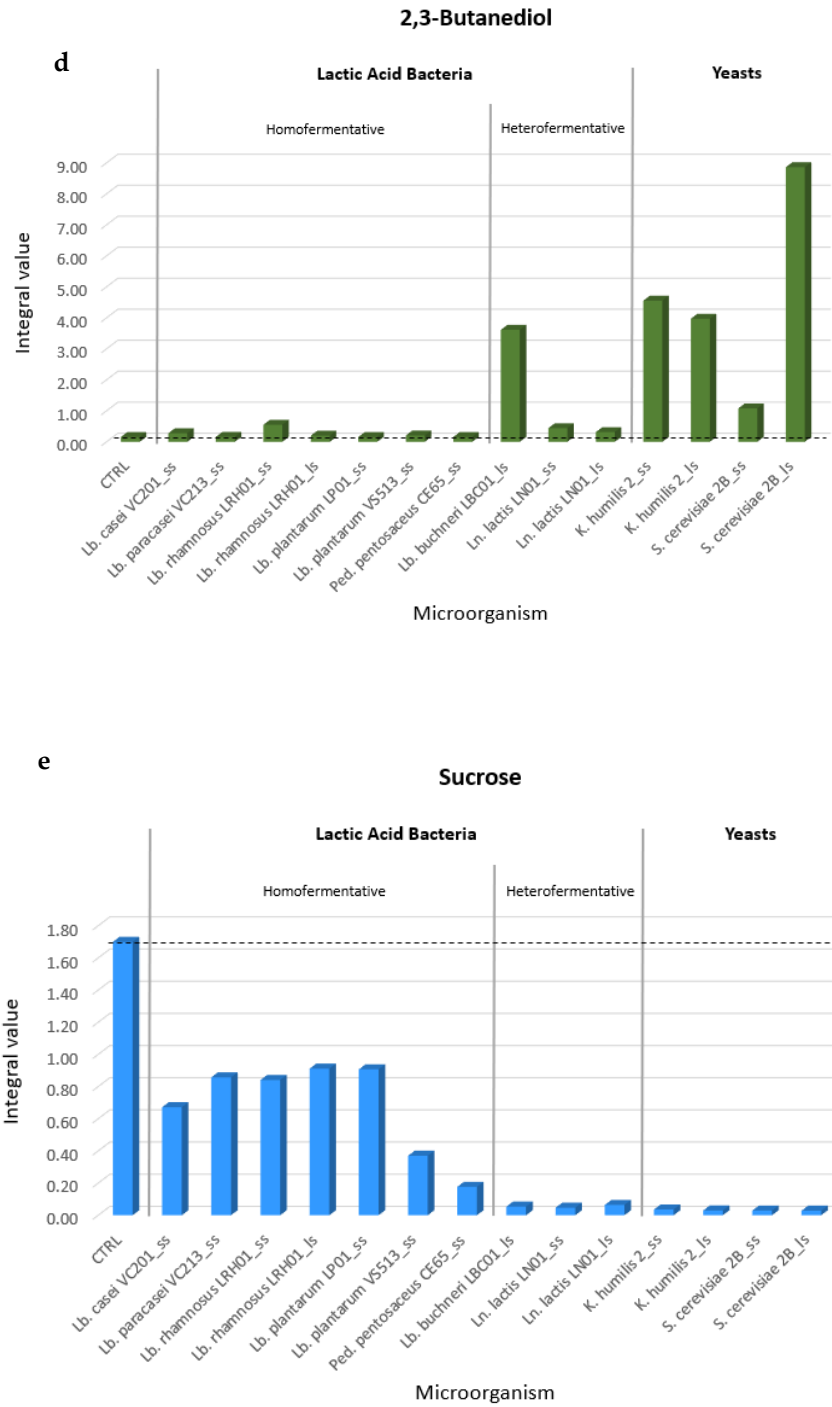

**Figure S6.** Quantification of the relative content (integral values normalized to the total spectral area) of fermentative metabolites: **(a)** lactate, **(b)** ethanol, **(c)** acetate, **(d)** 2,3-butanediol, and **(e)** sucrose in small- (ss) and large-scale (ls) fermented bean flours (with the exclusion of LBC01<sub>ss</sub>, and WS01<sub>ss</sub> samples) compared to control (CTRL). The dotted line indicates the integral value, for each metabolite, in CTRL sample.
